# Supplementary material
Source: Elsevier journal article supplement (https://www.sciencedirect.com/science/article/pii/S1695403319300670)
Supplement: mmc1 [file S1695403319300670:mmc1.docx]

**Anexo 1:**

Los miembros del grupo de trabajo de MOMUCIP RETROSPECTIVO:

Francisco Javier Pilar Orive; Unidad de Cuidados Intensivos Pediátricos. Hospital de Cruces, Barakaldo. España. Grupo de Ética de la Sociedad Española de Cuidados Intensivos Pediátricos

Elva Rodríguez Merino; Unidad de Cuidados Intensivos Pediátricos. Hospital de Cruces, Barakaldo. España. Grupo de Ética de la Sociedad Española de Cuidados Intensivos Pediátricos

Jesús López-Herce Cid; Unidad de Cuidados Intensivos Pediátricos. Hospital General Universitario Gregorio Marañón, Madrid. España.

Gema Manrique Martín; Unidad de Cuidados Intensivos Pediátricos. Hospital General Universitario Gregorio Marañón, Madrid. España

Paula García Casas; Unidad de Cuidados Intensivos Pediátricos. Hospital General Universitario Gregorio Marañón, Madrid. España.

Arturo Hernández González; Unidad de Cuidados Intensivos Pediátricos. Hospital Puerta del Mar, Cádiz. España. Grupo de Ética de la Sociedad Española de Cuidados Intensivos Pediátricos

Carmen Ramil Fraga; Unidad de Cuidados Intensivos Pediátricos. Complexo Hospitalario Universitario de A Coruña. A Coruña. España. Grupo de Ética de la Sociedad Española de Cuidados Intensivos Pediátricos.

Corsino Rey Galán; Unidad de Cuidados Intensivos Pediátricos. Hospital Universitario Central de Asturias, Oviedo. España.

María Rosario Riestra Rodríguez; Unidad de Cuidados Intensivos Pediátricos. Hospital Universitario Central de Asturias, Oviedo. España.

Ramón Hernández Rastrollo; Unidad de Cuidados Intensivos Pediátricos. Hospital Materno-Infantil, Badajoz. España. Grupo de Ética de la Sociedad Española de Cuidados Intensivos Pediátricos

Francisco Fernández Carrión; Unidad de Cuidados Intensivos Pediátricos. Hospital Clínico Universitario de Salamanca. España.

Antonio Rodríguez Núñez.; Sección de Pediatría Crítica, Cuidados Intermedios y Paliativos Pediátricos. Area de Pediatría. Complexo Hospitalario Universitario de Santiago de Compostela. Grupos de Investigación CLINURSID (Universidad de Santiago) y Soporte Vital y Simulación (FIDIS). Grupo de Ética de la Sociedad Española de Cuidados Intensivos Pediátricos
